# Supplementary material for: UHPLC-UV/PDA Method Validation for Simultaneous Quantification of Luteolin and Apigenin Derivatives from Elaeis guineensis Leaf Extracts: An Application for Antioxidant Herbal Preparation
Source: PubMed Central journal article supplement (PMC7922162; doi:10.3390/molecules26041084), 2021-02-19
Supplement: molecules-26-01084-s001.pdf [file molecules-26-01084-s001.pdf]

## Supplementary Materials

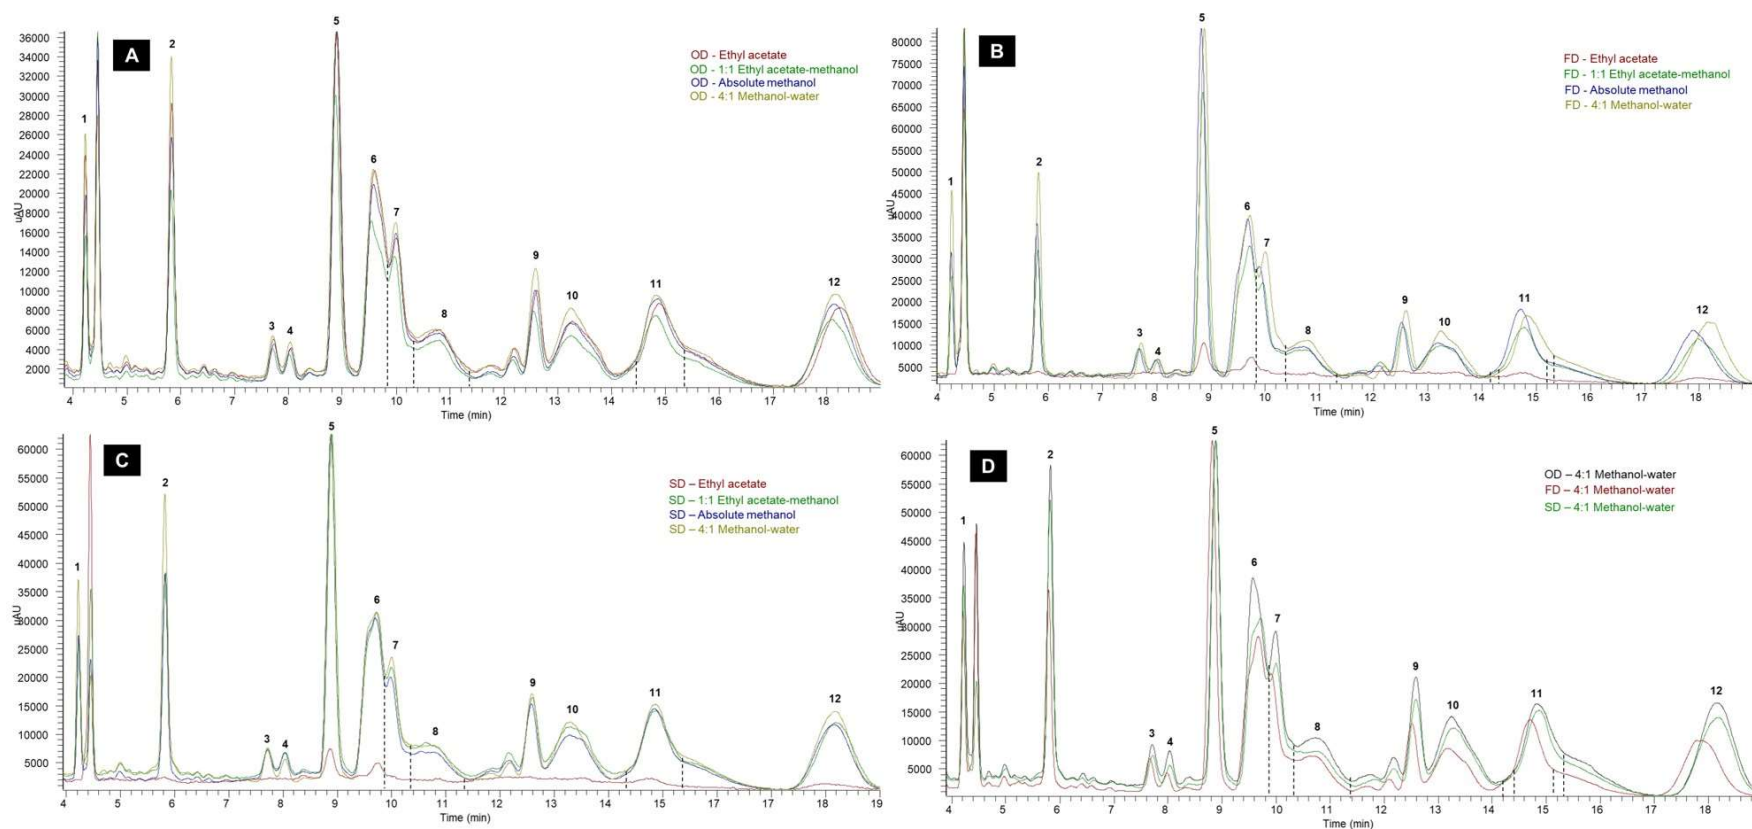

**Figure S1** Peak assignment for luteolin and apigenin derivatives in OPL extracts after subjected to different drying methods and extraction solvents in UV chromatograms at 340 nm. (A) Oven dry – solvents, (B) Freeze dry – solvents, (C) Shade dry – solvents and (D) Drying methods – 4:1 Methanol-water. Identified flavonoid C-glycosides: **1**, luteolin-6,8-di-C-hexose (Isomer 1); **2**, apigenin-6,8-di-C-hexose; **3**, luteolin-6,8-di-C-hexose (Isomer 2); **4**, apigenin-6-C-pentose-8-C-hexose (Isomer 1); **5**, isoorientin; **6**, orientin; **7**, luteolin-6-C-hexose-8-C-deoxyhexose (Isomer 1); **8**, apigenin-6-C-pentose-8-C-hexose (Isomer 2); **9**, luteolin-6-C-hexose-8-C-deoxyhexose (Isomer 2); **10**, vitexin; **11**, isovitexin; **12**, apigenin-6-C-hexose-8-C-deoxyhexose.

**Table S1** Identification of phytoconstituents in aqueous methanolic OPL extracts at different drying methods and solvents by UHPLC-MS/MS and UHPLC-UV/PDA method

| Peak | t <sub>R</sub><br>(min) | λ <sub>max</sub> ,<br>(nm) | [M-H] <sup>-</sup><br>(m/z) | Formula                                         | Key MS/MS fragments (m/z)                                     | Compound                            | OD |   |   |   |   | FD |   |   |   |   | SD |   |   |   |   |
|------|-------------------------|----------------------------|-----------------------------|-------------------------------------------------|---------------------------------------------------------------|-------------------------------------|----|---|---|---|---|----|---|---|---|---|----|---|---|---|---|
|      |                         |                            |                             |                                                 |                                                               |                                     | 1  | 2 | 3 | 4 | 5 | 1  | 2 | 3 | 4 | 5 | 1  | 2 | 3 | 4 | 5 |
| 1    | 4.17                    | 272,<br>348                | 609.1411                    | C <sub>27</sub> H <sub>30</sub> O <sub>16</sub> | 519.1104 489.0998, 429.0786, 399.0696,<br>369.0585            | Luteolin-6,8-di-C-hexose            | -  | + | + | + | + | -  | + | + | + | + | -  | + | + | + | + |
| 2    | 5.88                    | 272,<br>336                | 593.1464                    | C <sub>27</sub> H <sub>30</sub> O <sub>15</sub> | 503.1155, 473.1051, 383.0739, 353.0638                        | Apigenin-6,8-di-C-hexose            | -  | - | + | + | + | -  | - | + | + | + | -  | - | + | + | + |
| 3    | 7.72                    | 272,<br>346                | 609.1411                    | C <sub>27</sub> H <sub>30</sub> O <sub>16</sub> | 489.1001, 429.0789, 399.0679, 369.0604                        | Luteolin-6,8-di-C-hexose            | -  | - | + | + | + | -  | - | + | + | + | -  | - | + | + | + |
| 4    | 8.10                    | 272,<br>334                | 563.1359                    | C <sub>26</sub> H <sub>28</sub> O <sub>14</sub> | 473.1053, 443.0949, 383.0742, 353.0639                        | Apigenin-6-C-pentose-8-C-hexose     | -  | - | + | + | + | -  | - | + | + | + | -  | - | + | + | + |
| 5    | 8.86                    | 270,<br>348                | 447.0896                    | C <sub>21</sub> H <sub>20</sub> O <sub>11</sub> | 357.0588, 339.0480, 327.0483, 297.0379,<br>285.0381           | Isoorientin (Luteolin-6-C-hexose)   | -  | + | + | + | + | -  | + | + | + | + | -  | + | + | + | + |
| 6    | 9.60                    | 270,<br>350                | 447.0896                    | C <sub>21</sub> H <sub>20</sub> O <sub>11</sub> | 357.0587, 339.0476, 327.0485, 297.0378,<br>285.0380           | Orientin (Luteolin-8-C-hexose)      | -  | + | + | + | + | -  | + | + | + | + | -  | + | + | + | + |
| 7    | 10.00                   | 270,<br>348                | 593.1464                    | C <sub>27</sub> H <sub>30</sub> O <sub>15</sub> | 473.1049, 429.0792, 369.0590, 357.0589,<br>327.0485           | Luteolin-6-C-hexose-8-C-deoxyhexose | -  | - | + | + | + | -  | - | + | + | + | -  | - | + | + | + |
| 8    | 10.60                   | 274,<br>334                | 563.1359                    | C <sub>26</sub> H <sub>28</sub> O <sub>14</sub> | 503.1168, 473.1056, 443.0950, 383.0743,<br>353.0639           | Apigenin-6-C-pentose-8-C-hexose     | -  | - | + | + | + | -  | - | + | + | + | -  | - | + | + | + |
| 9    | 12.60                   | 272,<br>336                | 593.1464                    | C <sub>27</sub> H <sub>30</sub> O <sub>15</sub> | 473.1067, 413.0846, 369.0590, 357.0589,<br>293.0434           | Luteolin-6-C-hexose-8-C-deoxyhexose | -  | - | + | + | + | -  | - | + | + | + | -  | - | + | + | + |
| 10   | 13.44                   | 270,<br>338                | 431.0947                    | C <sub>21</sub> H <sub>20</sub> O <sub>10</sub> | 341.0639, 323.0529, 311.0536, 283.0589                        | Vitexin (Apigenin-6-C-hexose)       | -  | - | + | + | + | -  | - | + | + | + | -  | - | + | + | + |
| 11   | 14.85                   | 270,<br>338                | 431.0947                    | C <sub>21</sub> H <sub>20</sub> O <sub>10</sub> | 341.0638, 323.0536, 311.0536, 283.0588                        | Isovitexin (Apigenin-8-C-hexose)    | -  | + | + | + | + | -  | + | + | + | + | -  | + | + | + | + |
| 12   | 18.19                   | 270,<br>338                | 577.1306                    | C <sub>27</sub> H <sub>30</sub> O <sub>14</sub> | 457.1098, 413.0845, 353.0630, 341.0640,<br>311.0536, 293.0432 | Apigenin-6-C-hexose-8-C-deoxyhexose | -  | + | + | + | + | -  | + | + | + | + | -  | + | + | + | + |

1; hexane; 2, ethyl acetate; 3, 1:1 ethyl acetate-methanol; 4, absolute methanol; 5, 4:1 methanol-water; +, present; -, absent

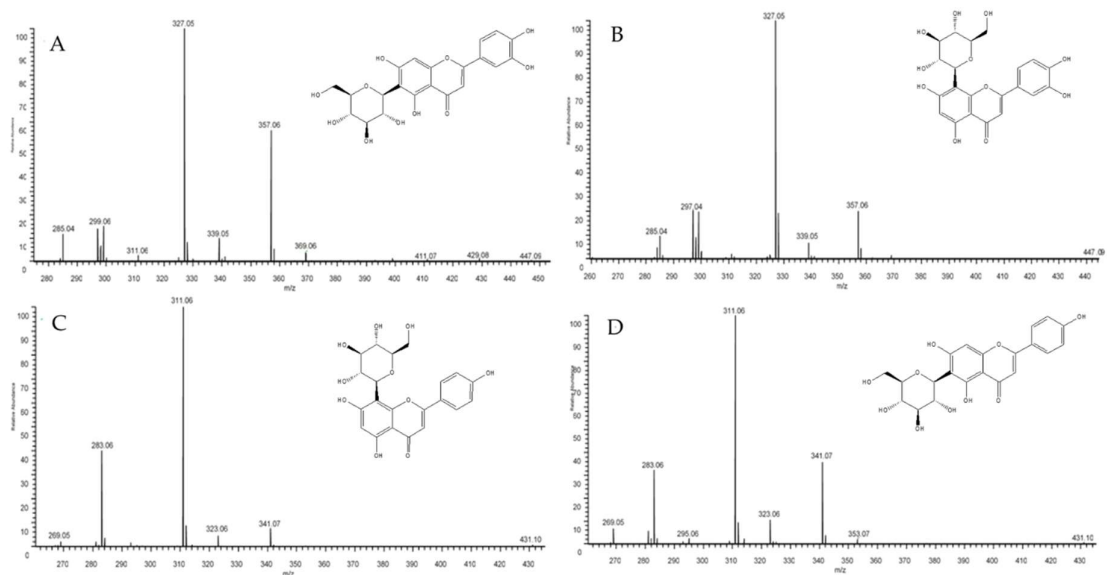

**Figure S2** LC-MS/MS spectra (ESI, negative mode) of OPL extract which the peak identified as (A) isoorientin; (B) orientin; (C) vitexin and (D) isovitexin. Characteristic fragment ions  $[M-H-90]^-$  ( $m/z$  357.06) and  $[M-H-120]^-$  ( $m/z$  327.05) of isoorientin and orientin while  $[M-H-90]^-$  ( $m/z$  341.07) and  $[M-H-120]^-$  ( $m/z$  311.06) of vitexin and isovitexin

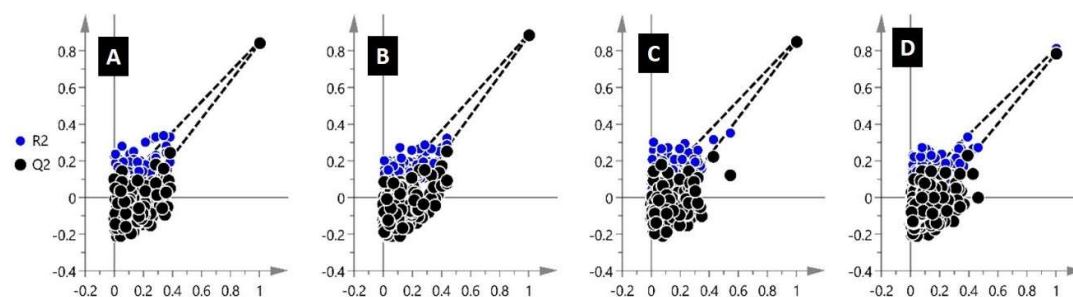

**Figure S3** Cross-validation plots of PLS model with 200 times permutation tests. Plot for Y-variable TPC (A); TFC (B);  $1/IC_{50}$  DPPH (C) and  $1/IC_{50}$  NO (D).
